# Supplementary material for: The relationship between social capital and self-rated health: a multilevel analysis based on a poverty alleviation program in the Philippines
Source: BMC Public Health. 2019 Dec 5;19:1641. doi: 10.1186/s12889-019-8013-5 (PMC6896750; doi:10.1186/s12889-019-8013-5)
Supplement: Supplementary file 2 — Additional file 2. Multilevel mixed-effects linear regression testing the impact of social capital on self-rated health, post-Transform. Supplementary table showing model building with social capital interaction terms [file 12889_2019_8013_MOESM2_ESM.xlsx]

## Sheet: Appendices
	Table 5A. Multilevel mixed-effects linear regression testing the impact of social capital on self-rated health, post-Transform, model building with social capital interaction terms
	Variables	Unstandardised estimate (S.E.)
		Model 1	Model 2	Model 3	Model 4	Model 5	Model 6	Model 7	Model 8	Model 9
	Fixed effects
	Bonding SC		-4.44 (3.31)	-3.25 (2.24)	-10.15 (4.20)*	-9.14 (4.12)*	-6.76 (5.41)	-3.39 (3.27)	-11.62 (5.85)*	-15.29 (6.65)*
	Bridging SC		6.20 (3.16)*	5.38 (2.19)*	-7.80 (12.46)	-14.80 (12.46)	5.38 (3.02)	13.90 (5.94)*	-14.16 (12.48)	-5.49 (12.86)
	Cognitive SC		4.22 (2.66)	5.42 (2.77)*	10.14 (4.12)*	5.54 (2.72)*	1.21 (4.92)	9.37 (4.06)*	2.34 (4.86)	4.36 (4.70)
	Bonding SC x Bridging SC				27.26 (13.82)*	23.82 (13.34)			23.08 (13.34)	26.25 (13.80)*
	Bonding SC x Cognitive SC						5.17 (5.86)		3.93 (5.76)	7.92 (6.92)
	Bridging SC x Cognitive SC				-13.94 (6.99)*			-11.99 (6.85)		-15.96 (8.12)*
	Age		-0.15 (0.04)***	-0.15 (0.04)***	-0.15 (0.04)***	-0.16 (0.04)***	-0.15 (0.04)***	-0.15 (0.04)***	-0.15 (0.04)***	-0.15 (0.04)***
	Sex
	Male		- reference category -
	Female		-0.04 (2.27)	-0.21 (1.66)	-0.11 (2.16)	-0.26 (2.20)	-0.20 (2.20)	-0.07 (2.17)	-0.26 (2.20)	-0.07 (2.17)
	Marital Status
	Married		- reference category -
	Live-in		-1.81 (1.37)	-1.69 (1.13)	-1.55 (1.40)	-1.59 (1.38)	-1.68 (1.37)	-1.67 (1.38)	-1.59 (1.37)	-1.54 (1.38)
	Separated		-1.56 (2.85)	-1.72 (3.66)	-1.31 (3.06)	-1.64 (2.99)	-1.78 (2.99)	-1.46 (3.07)	-1.68 (2.98)	-1.34 (3.06)
	Widowed		-4.88 (2.85)	-3.71 (2.04)	-3.77 (2.50)	-3.75 (2.48)	-3.73 (2.46)	-3.72 (2.48)	-3.77 (2.47)	-3.82 (2.51)
	Single		-0.61 (3.28)	-1.23 (2.90)	-1.09 (3.00)	-1.40 (3.02)	-1.25 (3.05)	-0.93 (3.02)	-1.41 (3.03)	-1.06 (3.02)
	Number of people in household		0.18 (0.21)	0.13 (0.24)	0.13 (0.20)	0.11 (0.20)	0.12 (0.20)	0.15 (0.19)	0.11 (0.20)	0.14 (0.20)
	Highest educational attainment
	None		- reference category -
	High school or below		2.53 (3.88)	3.54 (2.22)	3.63 (3.85)	3.58 (3.85)	3.63 (3.83)	3.58 (3.86)	3.65 (3.82)	3.78 (3.82)
	College or above		4.30 (4.26)	5.81 (2.71)*	5.74 (4.24)	5.84 (4.23)	5.89 (4.22)	5.71 (4.26)	5.90 (4.21)	5.85 (4.22)
	Is the respondent in work?
	No		- reference category -
	Yes		0.64 (1.27)	0.68 (0.93)	0.76 (1.17)	0.70 (1.17)	0.71 (1.16)	0.73 (1.17)	0.73 (1.16)	0.82 (1.15)
	Religion
	Roman Catholic		- reference category -
	Protestant		2.59 (1.22)*	2.98 (0.96)**	2.68 (1.16)*	2.82 (1.19)*	2.97 (1.22)*	2.87 (1.21)*	2.82 (1.19)*	2.65 (1.16)*
	Muslim		7.93 (4.02)*	6.95 (9.19)	6.66 (2.05)***	7.49 (2.25)**	6.89 (2.46)**	6.17 (2.27)**	7.43 (2.29)**	6.42 (2.17)**
	Iglesia ni Cristo		9.24 (1.63)***	7.07 (5.60)	7.16 (2.55)**	7.72 (2.26)**	7.31 (2.32)**	6.50 (2.57)**	7.87 (2.25)***	7.39 (2.57)**
	Other		-0.98 (2.67)	1.02 (1.54)	1.19 (1.82)	1.06 (1.85)	1.01 (1.87)	1.15 (1.84)	1.03 (1.85)	1.18 (1.81)
	Food security		30.00 (8.72)***	27.04 (5.23)***	26.18 (8.92)**	26.92 (7.72)**	26.96 (8.76)**	26.42 (8.88)**	26.87 (8.78)**	25.97 (9.06)**
	Hygiene		19.27 (3.10)***	19.41 (2.54)***	19.77 (2.82)***	19.71 (2.84)***	19.31 (2.85)***	19.41 (2.83)***	19.63 (2.85)***	19.60 (2.82)***
	Intercept	79.71 (0.74)***	31.81 (10.02)***	31.78 (5.53)***	34.31 (10.12)**	36.43 (10.25)***	34.64 (11.70)**	29.39 (10.20)**	38.45 (11.47)**	38.07 (11.52)**
	Random effects
	Level 1 variance	375.87 (37.90)	361.71 (36.09)	326.28 (10.76)	323.96 (31.17)	325.19 (31.43)	326.20 (32.07)	325.35 (31.80)	325.16 (31.51)	323.72 (31.29)
	Level 2
	Variance of random intercepts (RI)	14.82 (5.89)	15.65 (6.21)	196.60 (53.09)	195.74 (72.06)	195.75 (73.88)	194.60 (74.33)	196.80 (73.16)	194.31 (73.70)	192.81 (71.32)
	Variance of random slopes (RS)			256.37 (71.25)	256.41 (82.10)	255.57 (84.21)	254.23 (84.87)	257.21 (83.47)	254.00 (84.08)	253.33 (81.40)
	Covariance between the RI and RS			-216.55 (59.85)	-215.56 (75.40)	-215.42 (77.51)	-214.5 (78.07)	-216.88 (76.65)	-213.95 (77.35)	-212.59 (74.65)
	ICC	0.038	0.041
	Model information criteria
	-2 log-likelihood	-9517.59	-8436.89	-8374.24	-8368.31	-8371.50	-8373.78	-8371.85	-8371.23	-8367.31
	AIC	19041.18	16917.78	16796.48	16788.62	16792.98	16797.56	16793.7	16794.46	16788.63
	Ni = 1928, Nj = 44
	* p < 0.05; ** p < 0.01; *** p < 0.001
